# Supplementary material
Source: PubMed Central journal article supplement (PMC8302576)

# American Manuscript Editors

## English Editing Certificate

This document certifies that the manuscript listed below was edited by the expert staff of American Manuscript Editors, all of whom are native English speakers. Moreover, the document was edited for proper English language, grammar, punctuation, and spelling.

### Manuscript Title:

Refractive and visual outcomes of small incision lenticule extraction (SMILE) in eyes with thin corneas

### Authors:

Asli Kirmaci Kabakci, MD; Burcin Kepez Yildiz, MD; Yusuf Yildirim, MD; Alper Agca, MD; Fevziye Ondes Yilmaz, MD; Gokhan Demir, MD; Beril Tulu Aygun, MD; Ahmet Demirok, MD

### Certificate Verification Key:

214-911-690-215-440

### Project Number:

66855

This certificate may be verified by emailing [info@americanmanuscripteditors.com](mailto:info@americanmanuscripteditors.com). Documents receiving this certificate should be prepared for publication. However, please note that the author has the ability to accept or reject our suggestions for changes and can make changes after the editing process is complete, all of which can adversely affect the quality of the text after the editing process.

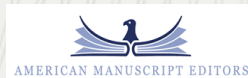

Supplement: 41433_2020_1256_MOESM1_ESM.pdf [file 41433_2020_1256_MOESM1_ESM.pdf]
